# Supplementary material for: Ddx56 maintains proliferation of mouse embryonic stem cells via ribosome assembly and interaction with the Oct4/Sox2 complex
Source: PubMed Central journal article supplement (PMC7376950; doi:10.1186/s13287-020-01800-w), 2020-07-23
Supplement: 13287_2020_1800_MOESM1_ESM.pdf [file 13287_2020_1800_MOESM1_ESM.pdf]

| <b>Additional file 1 Table S1 Information of PCR and qRT-PCR primers.</b> |                                 |
|---------------------------------------------------------------------------|---------------------------------|
| Ddx56-gRNA1-T7E1-FP                                                       | CGGAGGGCGTTCAAGGGACAGCATT       |
| Ddx56-gRNA1-T7E1-RP                                                       | TTGGCACAGTCGGGCACTTCATTCC       |
| Ddx56-gRNA2-T7E1-FP                                                       | TGTAGTTGCTTTGGTTAGTGAGGCAGTGTCC |
| Ddx56-gRNA2-T7E1-RP                                                       | GAGGCGGGAGGAGAAGAAATAAGACCAG    |
| Ddx56-qPCR-FP                                                             | GCCAACAACCCAGGCATAGT            |
| Ddx56-qPCR-RP                                                             | TGGTATGGAAGCAGGATGGG            |
| Oct4-qPCR-FP                                                              | GCAGGAGCACGAGTGGAAAGCAAC        |
| Oct4-qPCR-RP                                                              | CAAGGCCTCGAAGCGACAGATG          |
| Nanog-qPCR-FP                                                             | AGGCTTTGGAGACAGTGAGGTGC         |
| Nanog-qPCR-RP                                                             | TACCCTCAAACCTCTGGTCCTTC         |
| Sox2-qPCR-FP                                                              | CGAGATAAACATGGCAATCAAATG        |
| Sox2-qPCR-RP                                                              | AACGTTTGCCTTAAACAAGACCAC        |
| mGAPDH-qPCR-FP                                                            | TCCCACTCTTCCACCTTCGATGC         |
| mGAPDH-qPCR-RP                                                            | GGGTCTGGGATGGAAATTGTGAGG        |
| Gata4-qPCR-FP                                                             | TTCTTGCTCGGACTTGGGAC            |
| Gata4-qPCR-RP                                                             | TTCCCAGGCAGGTGGAGAATAAG         |
| Gata6-qPCR-FP                                                             | ACAGCCCACTTCTGTGTTCCC           |
| Gata6-qPCR-RP                                                             | GTGGGTTGGTCACGTGGTACAG          |
| Sox7-qPCR-FP                                                              | ATGCTGGGAAAGTCATGGAAG           |
| Sox7-qPCR-RP                                                              | CGTGTCTGGTCACGAGAGA             |
| Foxa2-qPCR-FP                                                             | AGCACCATTACGCCTTCAAC            |
| Foxa2-qPCR-RP                                                             | CCTTGAGGTCCATTTTGTGG            |
| Sox17-qPCR-FP                                                             | AAGAAACCCTAAACACAAACAGCG        |
| Sox17-qPCR-RP                                                             | TTTGTGGGAAGTGGGATCAAGAC         |
| Brachyury-qPCR-FP                                                         | CTCTAATGTCCTCCCTTGTGCC          |
| Brachyury-qPCR-RP                                                         | TGCAGATTGTCTTTGGCTACTTTG        |
| Nestin-qPCR-FP                                                            | CTGCAGGCCACTGAAAAGTTC           |
| Nestin-qPCR-RP                                                            | TCTGACTCTGTAGACCCTGCTTCTC       |
| Mash1-qPCR-FP                                                             | GCCACCAGAATGACTTCAGCAC          |
| Mash1-qPCR-RP                                                             | AAGGCAACCTATGGGAACCAAC          |
| Gpc3-qPCR-FP                                                              | CAGCCCGGACTCAAATGGG             |
| Gpc3-qPCR-RP                                                              | CAGCCGTGCTGTTAGTTGGTA           |
| Fgf10-qPCR-FP                                                             | TTTGGTGTCTTCGTTCCCTGT           |
| Fgf10-qPCR-RP                                                             | TAGCTCCGCACATGCCTTC             |
| Mt3-qPCR-FP                                                               | CTGGATATGGACCCTGAGACCT          |
| Mt3-qPCR-RP                                                               | CTTCACCTTTGCACACACAGTC          |
| Chrb2-qPCR-FP                                                             | AGGGGTTTTGGGTAAGTACAC           |
| Chrb2-qPCR-RP                                                             | AGCTTGTTATAGCGGGAAGGA           |
| Klf5-qPCR-FP                                                              | TGGAGAAGCGACGTATCCAC            |
| Klf5-qPCR-RP                                                              | AGGTGCACTTGTAGGGCTTC            |
| CD38-qPCR-FP                                                              | TCTTGCCACATTGGAGTGAA            |
| CD38-qPCR-RP                                                              | ACCACACCACAGGCATCTTC            |
| Tgfbr3-qPCR-FP                                                            | TACACTGGGCCCAAAGGAA             |
| Tgfbr3-qPCR-RP                                                            | TACACGTGGGAGGGAACACT            |
| Bmi1-qPCR-FP                                                              | TTGTACGCGAGAACATACAGC           |
| Bmi1-qPCR-RP                                                              | CTGAGTCGGGTCTTTGGC              |
| Egfr-qPCR-FP                                                              | GCCATCTGGGCCAAAGATACC           |
| Egfr-qPCR-RP                                                              | GTCTTCGCATGAATAGCCAAT           |
| Kctd11-qPCR-FP                                                            | CTGGGGGCCATGTTTAGGG             |
| Kctd11-qPCR-RP                                                            | AATTGAGGATGTGCCGGAAG            |
| Kdr-qPCR-FP                                                               | TTTGGCAAATAACAACCTTCAGA         |
| Kdr-qPCR-RP                                                               | GCAGAAGATACTGTCACCACC           |
| Ford3-qPCR-FP                                                             | GACCCCGAACAAGCCCAAG             |
| Ford3-qPCR-RP                                                             | GAAAACGGTTGCTGATGAACTC          |
| Wnt3a-qPCR-FP                                                             | CTCCTCTCGGATACCTCTTAGTG         |
| Wnt3a-qPCR-RP                                                             | CCAAGGACCACCAGATCGG             |
| Pura-qPCR-FP                                                              | CATCGACGACTATGGAGTGGA           |

|              |                       |
|--------------|-----------------------|
| Pura-qPCR-RP | TGTTGGAACCCACATCGAAGA |
|--------------|-----------------------|
