# Supplementary material for: Ddx56 maintains proliferation of mouse embryonic stem cells via ribosome assembly and interaction with the Oct4/Sox2 complex
Source: PubMed Central journal article supplement (PMC7376950; doi:10.1186/s13287-020-01800-w), 2020-07-23

Additional file 2 Figure S1

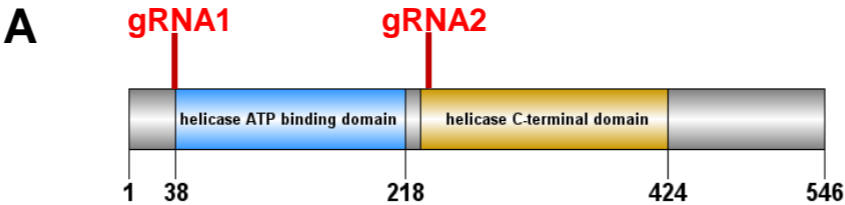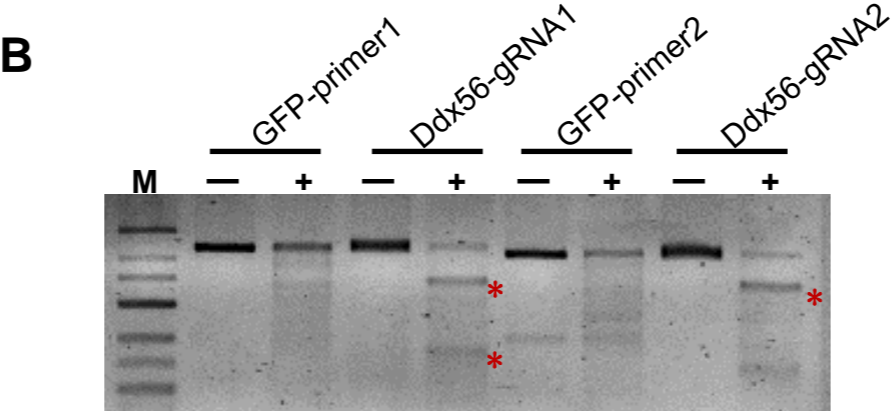

Additional file 2 Figure S2

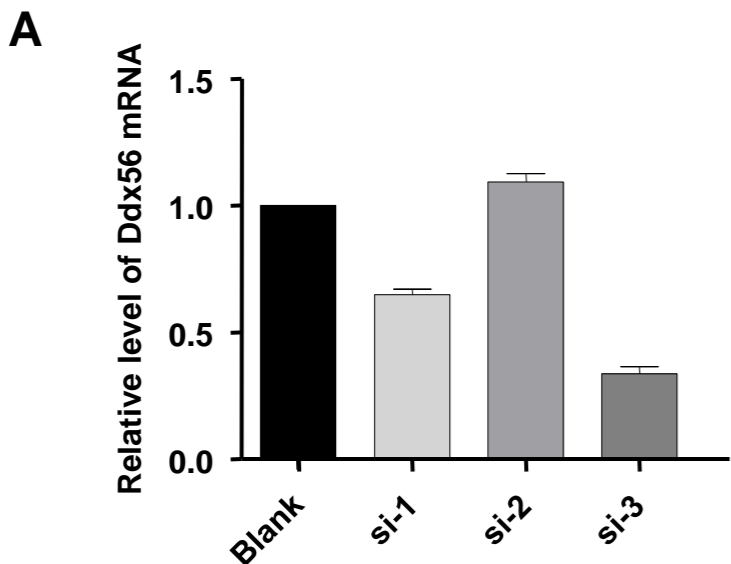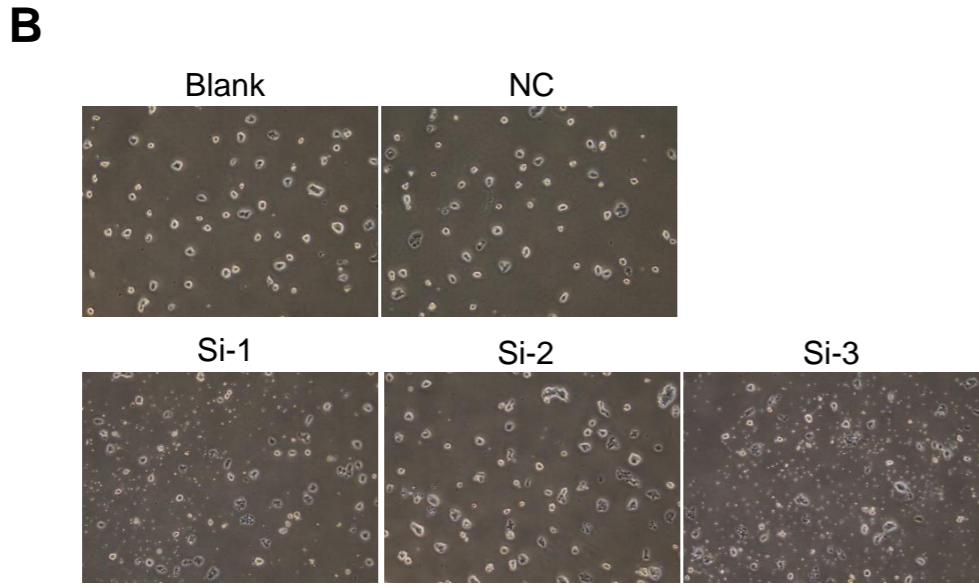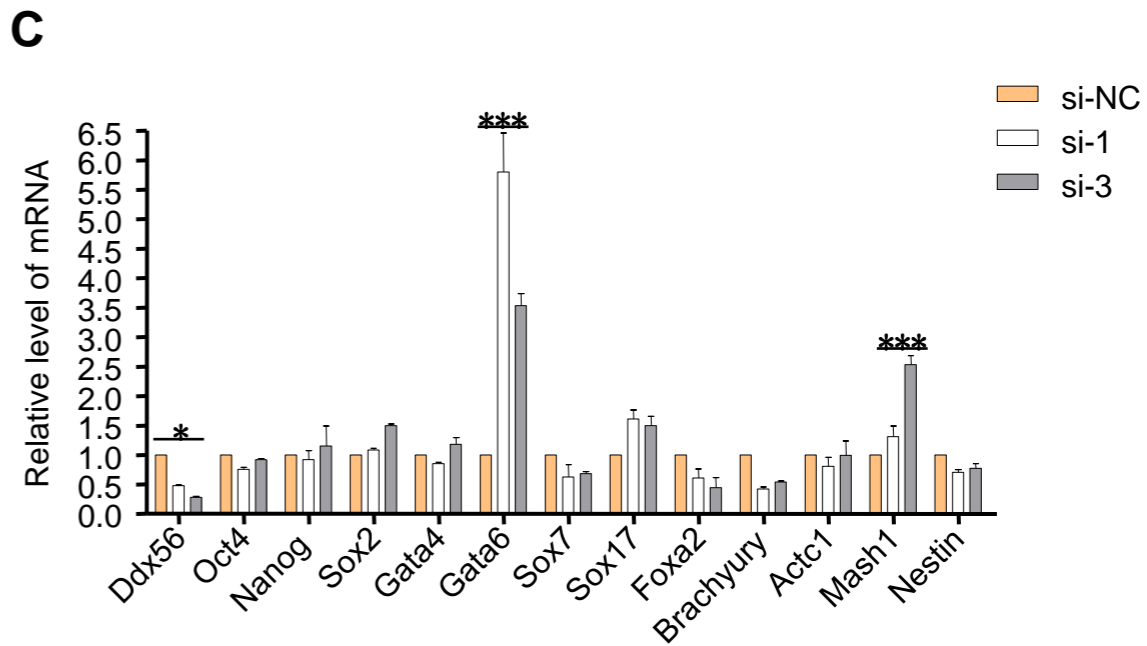

# Additional file 2 Figure S3

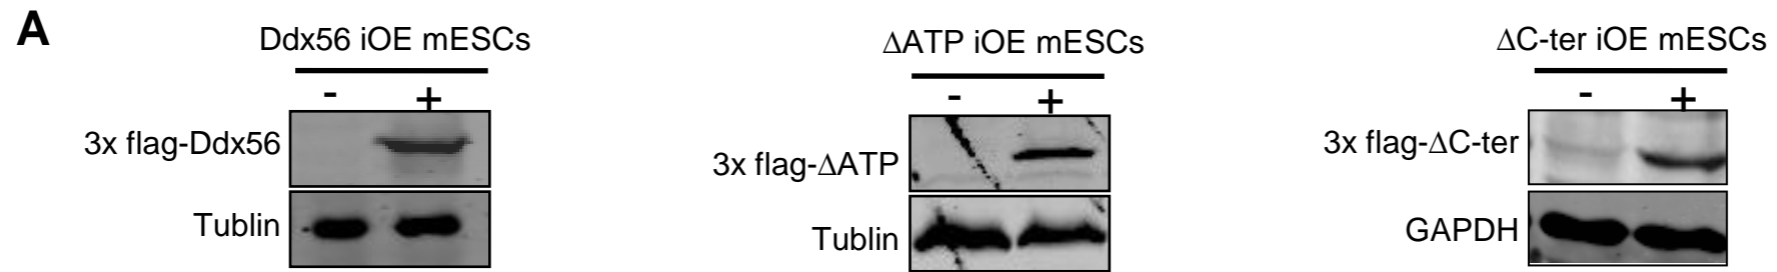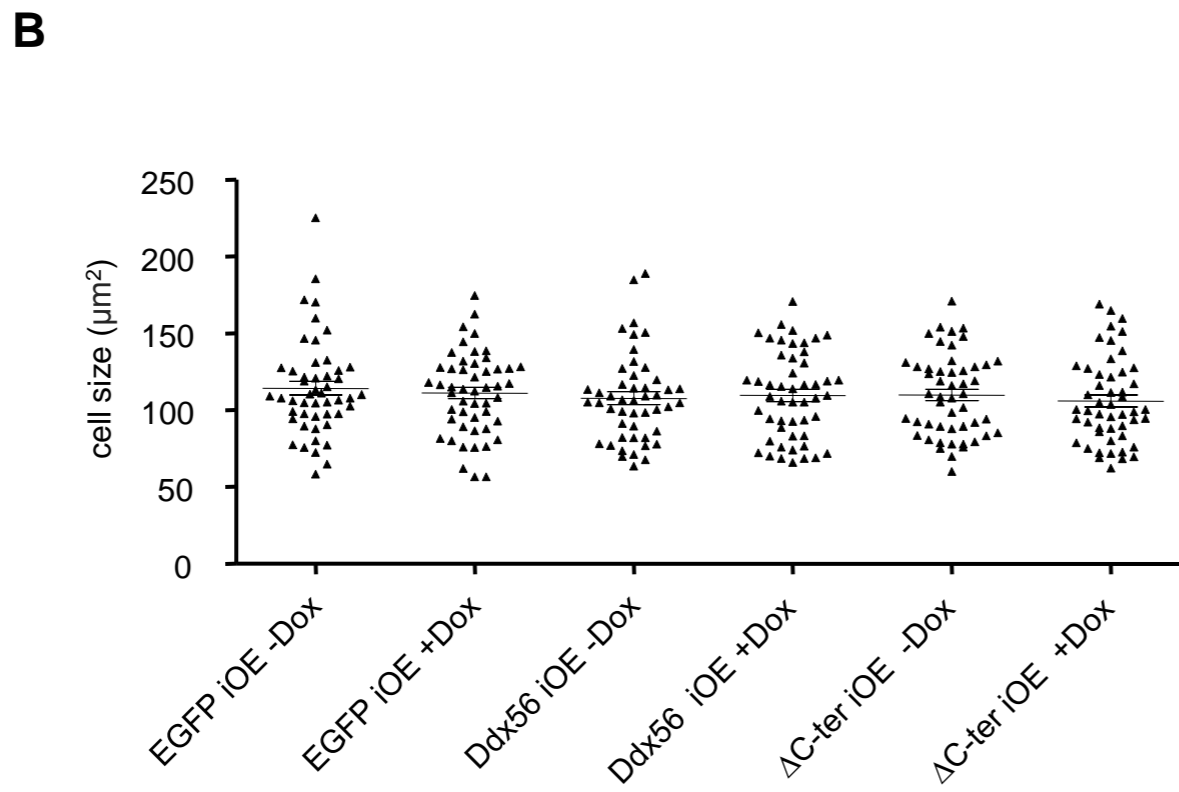

Additional file 2 Figure S4

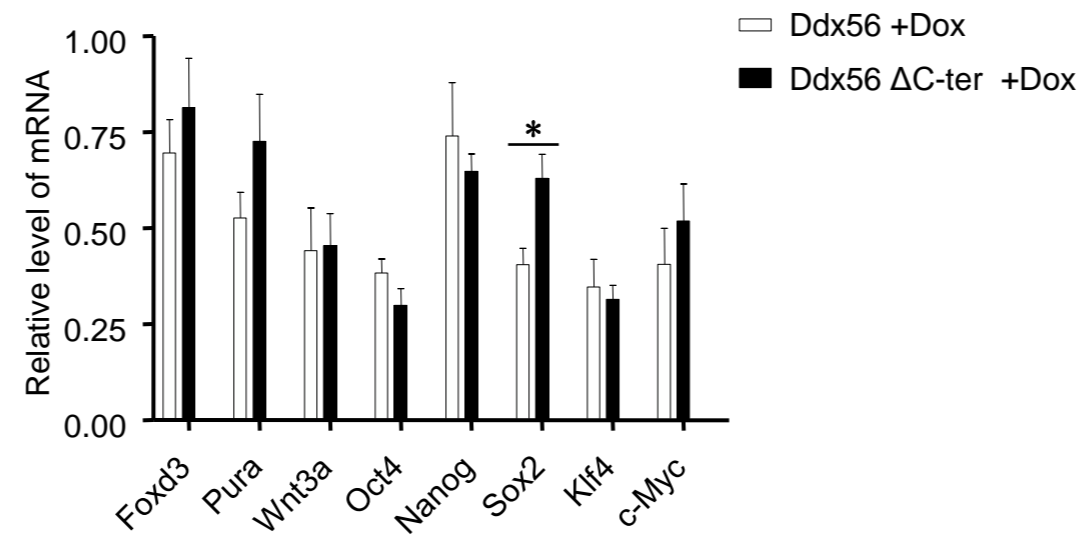

Additional file 2 Figure S5

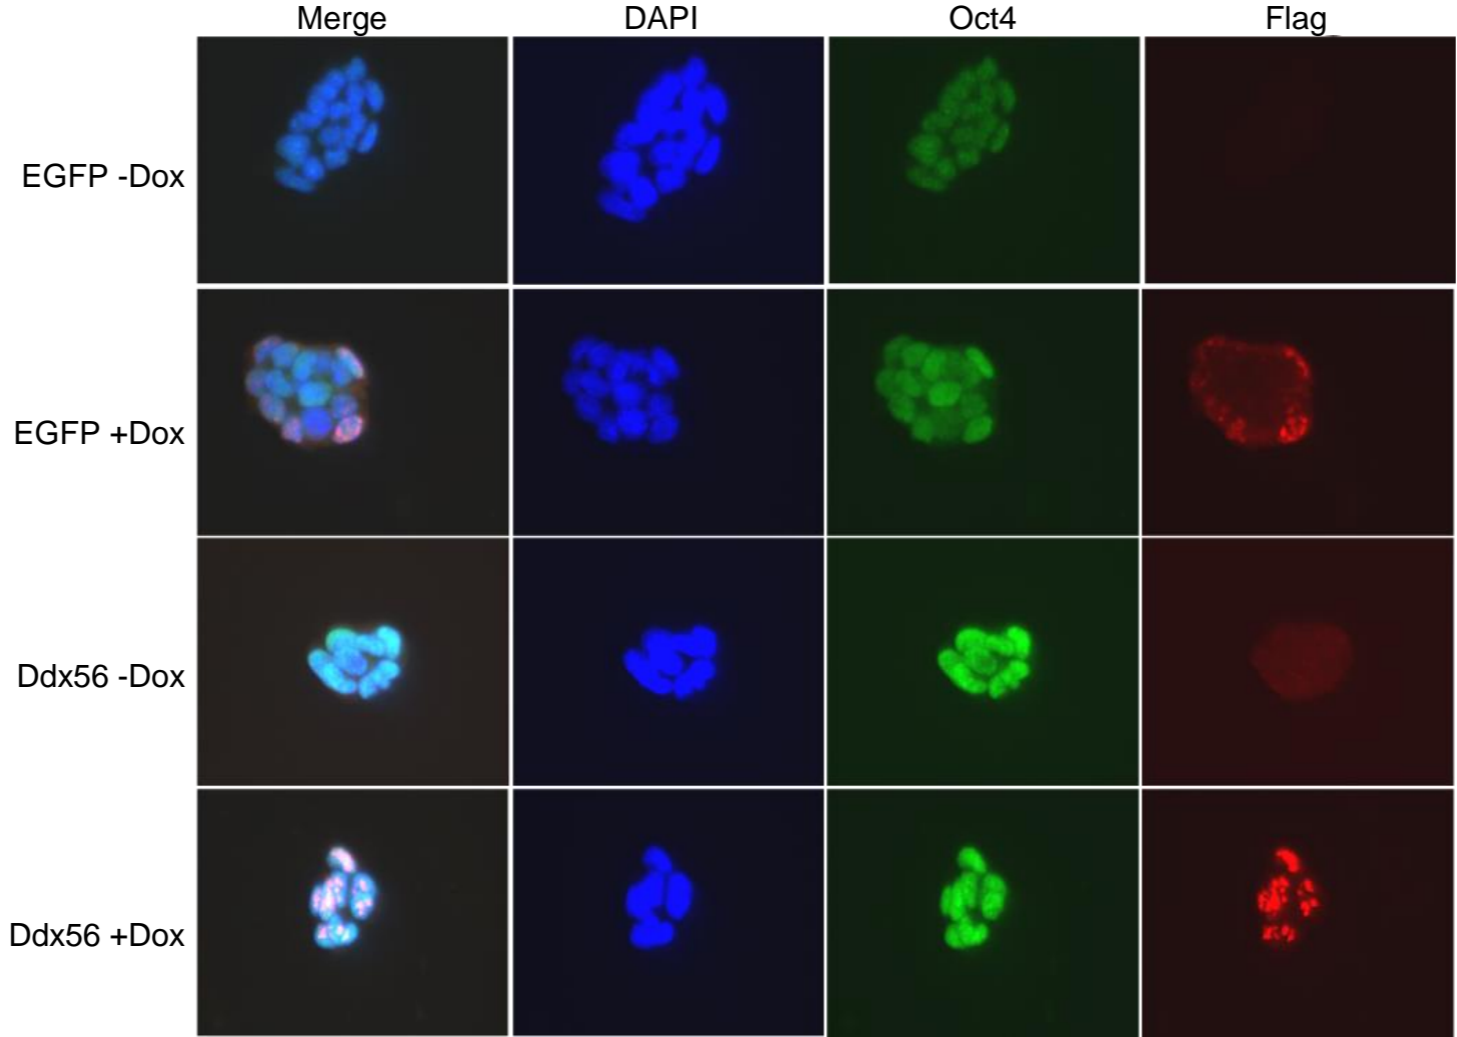

Supplement: 13287_2020_1800_MOESM2_ESM.pdf [file 13287_2020_1800_MOESM2_ESM.pdf]
